# Supplementary material
Source: Springer Nature journal article supplement (https://www.springermedizin.de/resource/supplementary/13030_2014_151_MOESM5_ESM.pdf/9644852)

## Work: This person would be...

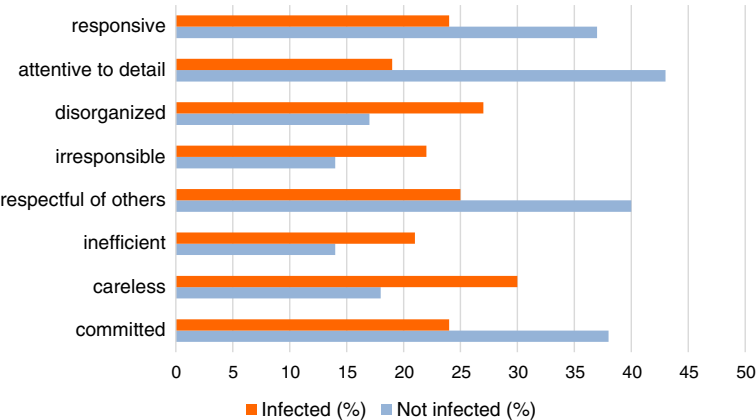

Supplement: MOESM5 [file 9644852]
